# Supplementary material for: Prognostic Risk Factors for Cancer-Specific Bone Metastasis: A Registry-Based Analysis of 13,742 Patients
Source: Research Square preprint supplement (doi:10.21203/rs.3.rs-8384769/v1), 2026-01-01
Supplement: Supplementary file 1 [file 810bbd3c6a76b337dd35758d.docx]

|  | BM (n, %) | CV (%) | Kruskal-Wallis Test *p* |
| --- | --- | --- | --- |
| Bladder Cancer | 189 (40.8) | 86.86 | <0.001*  More than 35 *p* values less than 0.01 among the subsequent 55 pairwise comparisons |
| Breast Cancer | 942 (48.1) | 79.93 |
| Colorectal Cancer | 426 (27.1) | 77.74 |
| Esophagogastric Cancer | 155 (29.7) | 76.04 |
| Head and Neck Cancer | 142 (51.4) | 85.69 |
| Hepatobiliary Cancer | 135 (22.1) | 103.81 |
| Melanoma | 173 (51.7) | 92.02 |
| Non-Small Cell Lung Cancer | 1677 (59.2) | 96.34 |
| Pancreatic Cancer | 827 (40.1) | 97.52 |
| Prostate Cancer | 642 (74.7) | 82.79 |
| Small Cell Lung Cancer | 110 (49.1) | 184.59 |

Table 1 Survival heterogeneity among BM patients across different cancers

BM=bone metastasis, CV=coefficient of variation

Table 2 Survival heterogeneity among OBM patients across different cancers

|  | OBM (n, %) | OBM CV (%) | OBM Survival (months) | OSM Survival (months) | *p* | PS (OBM>OSM) 95% CI | Cliff's δ 95% CI | Kruskal-Wallis Test *p* |
| --- | --- | --- | --- | --- | --- | --- | --- | --- |
| Bladder Cancer | 29 (15.3) | 73.90 | 11.41 (5.95 – 18.41) | 10.14 (4.17 – 16.09) | 0.400 | 0.548 (0.439-0.651) | 0.095 (-0.121-0.303) | <0.001 |
| Breast Cancer | 232 (24.6) | 76.10 | 27.80 (13.48 – 46.91) | 20.40 (9.52 – 37.93) | <0.001* | 0.587 (0.546-0.628) | 0.174 (0.091-0.257) |
| Esophagogastric Cancer | 25 (16.1) | 69.40 | 12.98 (5.50 – 18.63) | 13.05 (6.54 – 20.90) | 0.717 | 0.478 (0.359-0.596) | -0.043 (0.282-0.191) |
| Hepatobiliary Cancer | 32 (23.7) | 138.20 | 8.87 (6.09 – 16.65) | 12.06 (6.21 – 22.80) | 0.281 | 0.443 (0.355-0.534) | -0.114 (-0.290-0.069) |
| Non-Small Cell Lung Cancer | 169 (10.1) | 101.30 | 8.38 (2.96 – 19.12) | 11.33 (4.59 – 21.26) | 0.024* | 0.447 (0.401-0.493) | -0.106 (-0.197, -0.013) |
| Prostate Cancer | 255 (39.7) | 77.50 | 17.13 (8.19 – 29.51) | 14.41 (6.51 – 28.06) | 0.041* | 0.544 (0.504-0.587) | 0.089 (0.007-0.173) |

OBM=only bone metastasis, CV=coefficient of variation, OSM=other sites metastasis, probability of superiority, CI=confidence interval

Table 3 Distribution of metastatic sites among different cancers across different cancers

|  | OMB | BM | Only Liver | Only Lung | Intra-abdominal | Pelvis | Soft Tissue | Brain | Kruskal-Wallis/Mann-Whitney *p* |
| --- | --- | --- | --- | --- | --- | --- | --- | --- | --- |
| Breast Cancer | 232 | N/A | 388 | 103 | 25 | 39 | 49 | 64 | 0.003 |
| Prostate Cancer | 255 | N/A | 68 | 25 | N/A | 24 | N/A | N/A | <0.001 |
| Non-small Cell Lung Cancer | 169 | N/A | 147 | N/A | 31 | N/A | N/A | 171 | 0.009 |
| Colorectal Cancer | N/A | 57 | 188 | 54 | 30 | 151 | N/A | N/A | <0.001 |
| Endometrial Cancer | N/A | 86 | 73 | 35 | 47 | 20 | N/A | N/A | 0.023 |
| Hepatobiliary Cancer | 24 | N/A | N/A | 60 | 145 | N/A | 22 | N/A | 0.037 |
| Soft Tissue Sarcoma | N/A | 88 | 42 | 77 | 36 | N/A | N/A | N/A | <0.001 |
| Thyroid Cancer | N/A | 73 | N/A | 36 | N/A | N/A | N/A | N/A | 0.043 |
| Uterine Sarcoma | N/A | 27 | N/A | 25 | 43 | 18 | N/A | N/A | <0.001 |

OBM=only bone metastasis, BM=bone metastasis.

Table 4 Survival outcomes of different pathological subtypes in BM patients across different cancers

|  | Number | Survival (months) | Kruskal-Wallis/Mann-Whitney Test *p* |
| --- | --- | --- | --- |
| Bladder Urothelial Carcinoma | 156 | 10.03 (4.72 - 15.63) | 0.193 |
| Upper Tract Urothelial Carcinoma | 33 | 8.31 (1.77 - 16.56) |
|  |  |  |  |
| HER2+HR+ | 58 | 21.12 (13.66-40.25) | <0.001* |
| HER2+HR- | 43 | 15.47 (7.85-28.22) |
| HER2-HR+ | 618 | 20.36 (11.01-33.95) |
| **HER2-HR-/Triple Negative** | 129 | 10.35 (4.57-17.38) |
|  |  |  |  |
| Breast Invasive Ductal Carcinoma | 702 | 18.56 (9.29 - 32.87) | 0.050* |
| Breast Invasive Lobular Carcinoma | 137 | 21.29 (11.01 - 39.52) |
|  |  |  |  |
| Colon Adenocarcinoma | 278 | 17.83 (9.28 - 30.15) | 0.581 |
| Mucinous Adenocarcinoma | 11 | 11.83 (6.82 - 30.15) |
| Rectal Adenocarcinoma | 92 | 17.21 (8.51 - 29.39) |
|  |  |  |  |
| Uterine Malignant Mixed Mullerian Tumor | 20 | 15.52 (9.98 - 20.65) | 0.309 |
| Uterine Endometrioid Carcinoma | 40 | 17.30 (9.91 - 23.23) |
| Uterine Papillary Serous Carcinoma | 26 | 10.62 (5.64 - 22.22) |
|  |  |  |  |
| Adenocarcinoma of the Gastroesophageal Junction | 25 | 15.31 (6.80 - 18.56) | 0.157 |
| Esophageal Adenocarcinoma | 75 | 13.80 (6.77 - 21.46) |
| Stomach Adenocarcinoma | 48 | 8.25 (5.30 - 18.85) |
|  |  |  |  |
| Gallbladder Carcinoma | 127 | 12.10 (5.83-21.34) | 0.182 |
| Extrahepatic cholangiocarcinoma | 85 | 12.19 (7.82-23.23) |
| Hepatocellular Carcinoma | 114 | 10.94 (4.68-25.02) |
| Intrahepatic Cholangiocarcinoma | 275 | 11.20 (5.31-20.37) |
|  |  |  |  |
| Anorectal Mucosal Melanoma | 13 | 9.66 (4.04 - 18.93) | 0.469 |
| Cutaneous Melanoma | 91 | 9.66 (4.04 - 18.93) |
| Head and Neck Mucosal Melanoma | 12 | 9.21 (7.27 - 15.76) |
| Mucosal Melanoma of Vagina | 10 | 15.29 (12.10 - 27.57) |
| Uveal Melanoma | 19 | 13.08 (4.32 - 27.75) |
|  |  |  |  |
| Lung Neuroendocrine Carcinoma | 47 | 6.83 (1.98 - 13.36) | <0.001* |
| **Lung Adenocarcinoma** | 1402 | 11.73 (4.81 - 23.78) |
| Lung Squamous Cell Carcinoma | 139 | 8.02 (3.17 - 16.88) |
| **Poorly Differentiated Non-Small Cell Lung Cancer** | 24 | 4.06 (2.10 - 13.98) |
|  |  |  |  |
| Clear Cell Ovarian Cancer | 11 | 8.67 (4.55 - 14.47) | 0.039* |
| High-Grade Serous Ovarian Cancer | 67 | 12.29 (8.21 - 19.26) |
| **Low-Grade Serous Ovarian Cancer** | 9 | 23.00 (13.80 - 32.92) |
|  |  |  |  |
| Pancreatic Adenocarcinoma | 749 | 8.55 (3.84 - 16.24) | <0.001* |
| Pancreatic Neuroendocrine Tumor | 59 | 19.10 (8.58 - 30.37) |
| **Undifferentiated Carcinoma of the Pancreas** | 7 | 2.89 (2.09 - 9.04) |
| Acinar Cell Carcinoma/Adenosquamous | 12 | 12.39 (8.88 - 17.01) |
|  |  |  |  |
| Combined Small Cell Lung Carcinoma | 14 | 8.16 (3.62 - 11.67) | 0.542 |
| Small Cell Lung Cancer | 102 | 8.81 (5.04 - 13.93) |
|  |  |  |  |
| **Anaplastic Thyroid Carcinoma** | 15 | 3.62 (1.73 - 9.62) | <0.001* |
| Papillary Thyroid Cancer | 41 | 17.54 (13.28 - 27.73) |
| Poorly Differentiated Thyroid Cancer | 76 | 18.40 (8.27 - 26.50) |
|  |  |  |  |
| Leiomyosarcoma | 28 | 18.33 (12.47–30.39) | 0.051 |
| **Undifferentiated Pleomorphic Sarcoma/Malignant Fibrous Histiocytoma/High-Grade Spindle Cell Sarcoma** | 31 | 17.06 (8.20–19.83) |
| **Dedifferentiated Liposarcoma** | 20 | 8.64 (4.99–20.32) |

HER2=Human Epidermal Growth Factor Receptor 2, HR=Hormone Receptor.

Table 5 Impact of sex on survival in BM patients across different cancers

| Cancer Type | Male (n, %) | Male Survival (months) | Female Survival (months) | Mann-Whitney Test *p* | Log-Rank (Mantel-Cox) *p* |
| --- | --- | --- | --- | --- | --- |
| Bladder Cancer | 153 (81.0) | 9.76 (3.38-15.24) | 11.24 (5.38 - 17.32) | 0.340 | 0.714 |
| Colorectal Cancer | 245 (57.5) | 18.02 (9.20-29.67) | 15.44 (8.31 - 29.11) | 0.389 | 0.614 |
| Esophagogastric Cancer | 115 (74.2) | 12.19 (6.52-19.19) | 12.23 (5.52 - 21.24) | 0.657 | 0.636 |
| Head and Neck Cancer | 113 (79.6) | 10.38 (3.55-15.90) | 8.02 (3.94 - 13.57) | 0.423 | 0.523 |
| Hepatobiliary Cancer | 52 (38.5) | 9.35 (5.39-21.02) | 10.32 (4.37 - 18.61) | 0.996 | 0.961 |
| Melanoma | 94 (54.3) | 11.27 (4.48 - 21.86) | 9.66 (3.76 - 16.49) | 0.246 | 0.171 |
| Non-Small Cell Lung Cancer | 783 (46.7) | 10.62 (4.04 - 21.05) | 11.41 (4.68 - 23.80) | 0.028* | 0.003 |
| Pancreatic Cancer | 441 (53.3) | 8.78 (3.62 - 16.60) | 9.22 (4.08 - 18.18) | 0.244 | 0.114 |
| Small Cell Lung Cancer | 64 (58.2) | 8.84 (4.64 - 12.68) | 8.05 (5.18 - 13.93) | 0.846 | 0.977 |
| Renal Cell Cancer | 70 (76.1) | 13.34 (5.33 - 29.41) | 14.38 (6.04 - 25.07) | 0.848 | 0.297 |
| Soft Tissue Sarcoma | 53 (60.2) | 17.18 (8.54 - 26.18) | 12.39 (6.83 - 21.27) | 0.157 | 0.480 |
| Thyroid Cancer | 40 (57.1) | 21.71 (10.77 - 30.91) | 17.51 (13.39 - 23.87) | 0.319 | 0.117 |
| Salivary Gland Cancer | 30 (52.6) | 11.88 (7.84 - 26.05) | 10.91 (3.93 - 18.02) | 0.234 | 0.343 |

BM=bone metastasis

Table 6 Impact of age at diagnosis on survival in BM patients across different cancers

|  | Age at Diagnosis (years) | Optimal Threshold 95% CI (Years) | Bootstrap 95% CI | Log-Rank (Mantel-Cox) *p* |
| --- | --- | --- | --- | --- |
| Breast Cancer | 54.6 (45.8–63.0) | 47 | (37.72, 67.37) | 0.041 |
| Prostate Cancer | 66.9 (60.5–74.1) | 60 | (55.29, 78.12) | 0.336 |
| Ovarian Cancer | 54.5 (46.0–67.5) | 40 | (36.19, 70.38) | 0.397 |
| Salivary Gland Cancer | 55.3 (46.6–64.2) | 52 | (39.82, 64.72) | 0.120 |
| Head and Neck Cancer | 58.7 (50.3–67.4) | 76 | (49.20, 76.27) | 0.004* |
| Endometrial Cancer | 64.7 (58.1–67.3) | 65 | (52.78, 72.14) | 0.392 |
| Uterine Sarcoma | 54.5 (51.4–60.9) | 57 | (49.90, 63.47) | 0.005* |
| Small Cell Lung Cancer | 66.0 (60.2–71.2) | 71 | (57.02, 73.51) | 0.323 |
| Pancreatic Cancer | 65.9 (58.0–73.0) | 67 | (56.00, 74.22) | 0.620 |
| Bladder Cancer | 66.3 (60.0–73.1) | 74 | (58.29, 74.01) | 0.05* |
| Soft Tissue Sarcoma | 60.4 (49.9–67.7) | 65 | (43.47, 71.36) | 0.553 |
| Non-Small Cell Lung Cancer | 66.8 (58.4–73.4) | 66 | (56.99, 74.98) | 0.317 |
| Esophagogastric Cancer | 61.9 (52.6–69.3) | 69 | (53.29, 69.46) | 0.106 |
| Melanoma | 62.8 (50.4–72.0) | 66 | (45.07, 75.67) | 0.227 |
| Colorectal Cancer | 54.5 (46.1 – 63.7) | 62 | (45.23–65.79) | 0.238 |
| Hepatobiliary Cancer | 61.7 (52.8 – 70.4) | 56 | (53.85–68.64) | 0.019* |
| Renal Cell Cancer | 58.8 (52.8 – 65.3) | 60 | (52.44–67.91) | 0.904 |
| Thyroid Cancer | 63.2 (57.5 – 72.1) | 59 | (51.15–72.84) | 0.134 |

BM=bone metastasis
